# Supplementary material for: Transcriptomic Analysis of Human Brain -Microvascular Endothelial Cell Driven Changes in -Vascular Pericytes
Source: MDPI journal article supplement (doi:10.3390/cells10071784), 2021-07-14
Supplement: s1 [file s1]

## Supplementary Material/data

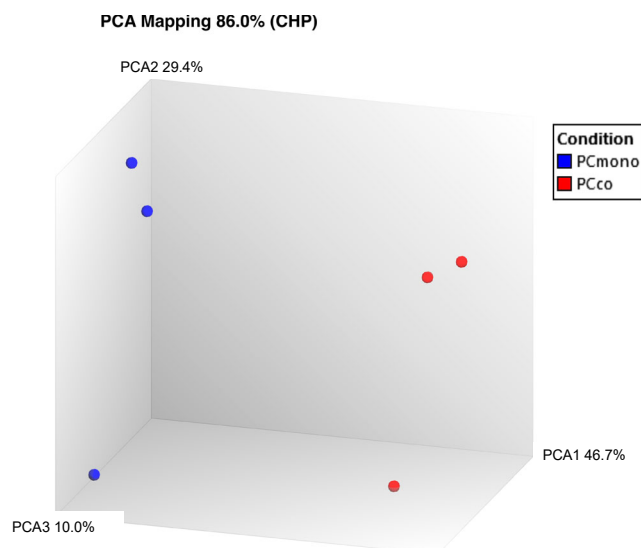

**Figure S1:** Principle Component Analysis (PCA).

PCA shows a clear separation between the samples from pericyte mono cultures (blue) and co-cultures (red) (a). PCA was automatically performed by the Transcriptome Analysis Console (TAC).

**Table S1:** List of highly regulated genes as confirmed by qRT-PCR.

| Gene   | Gene description                                                 | rel. expression level (%)<br>upon co-culture | Cat. No.  |
|--------|------------------------------------------------------------------|----------------------------------------------|-----------|
| IFIT1  | Interferon-induced protein with tetratricopeptide repeats 1      | 241 (+/- 49)                                 | PPH01332F |
| MX1    | MX dynamin-like GTPase 1 (interferon-induced)                    | 209 (+/- 10)                                 | PPH01325A |
| IFI44L | Interferon-induced protein 44-like                               | 362 (+/- 25)                                 | PPH05811G |
| IFI6   | Interferon, alpha-inducible protein 6                            | 209 (+/- 2)                                  | PPH01322C |
| XAF1   | XIAP associated factor 1                                         | 141 (+/- 25)                                 | PPH58211A |
| NPTX1  | Neuronal pentraxin I                                             | 76 (+/- 23)                                  | PPH10301B |
| JUN    | Jun proto-oncogene                                               | 38 (+/- 6)                                   | PPH00095A |
| SLC6A6 | Solute carrier family 6 (neurotransmitter transporter), member 6 | 67 (+/- 10)                                  | PPH01451E |
| GAPDH  | Glyceraldehyde-3-phosphate dehydrogenase                         | -                                            | PPH00150F |
| PDGFRB | Platelet-derived growth factor receptor-beta                     | -                                            | PPH00477C |

For confirming microarray results, qRT-PCR has been performed using the Custom RT2 PCR arrays from Qiagen in a 96-wellplate format. The tested genes are listed together with their relative expression levels (co-cultured vs. mono-cultured cells) in the third column. The catalogue number

(cat.no.) is noted in the last column. The experiment has been performed once in triplicates and expression levels represent mean (+/- standard deviation of the mean).

**Table S2:** Pathway enrichment analysis (GO biological processes) of differentially regulated genes (DRGs) between pericytes cultured with and without endothelial cells (ECs).

| Pathway                                                                              | Overlap  | adj. P-value |
|--------------------------------------------------------------------------------------|----------|--------------|
| Positive Regulation of gene expression                                               | 152/771  | 5.70E-07     |
| Type I interferon signaling pathway                                                  | 26/65    | 1.07E-05     |
| mRNA processing                                                                      | 67/283   | 1.72E-05     |
| Positive regulation of gene expression, epigenetic                                   | 21/47    | 1.72E-05     |
| Positive regulation of transcription, DNA-templated                                  | 192/1120 | 4.79E-05     |
| Regulation of transcription, DNA-templated                                           | 255/1598 | 1.75E-04     |
| Regulation of transcription from RNA polymerase II promoter                          | 237/1478 | 2.86E-04     |
| Transcription, DNA-templated                                                         | 74/356   | 4.74E-04     |
| Regulation of cyclin-dependent protein serine/threonine kinase activity              | 23/67    | 5.88E-04     |
| Regulation of viral genome replication                                               | 22/63    | 6.50E-04     |
| Regulation of gene expression, epigenetic                                            | 24/74    | 9.27E-04     |
| RNA splicing, via transesterification reactions with bulged adenosine as nucleophile | 53/236   | 1.06E-03     |
| mRNA splicing, via spliceosome                                                       | 57/261   | 1.08E-03     |
| mRNA metabolic process                                                               | 28/97    | 1.49E-03     |
| Transcription from RNA polymerase II promoter                                        | 91/485   | 1.63E-03     |
| Regulation of keratinocyte differentiation                                           | 13/29    | 2.27E-03     |
| Cellular response to cadmium ion                                                     | 12/29    | 2.27E-03     |
| Positive regulation of macromolecule metabolic process                               | 58/276   | 2.27E-03     |
| Negative regulation of apoptotic process                                             | 90/485   | 2.30E-03     |
| Positive regulation of keratinocyte differentiation                                  | 8/12     | 2.59E-03     |
| Regulation of gene expression                                                        | 168/1037 | 2.68E-03     |
| Regulation of alcohol biosynthetic process                                           | 14/34    | 2.68E-03     |
| Embryonic limb morphogenesis                                                         | 14/34    | 2.68E-03     |
| Positive regulation of transcription from RNA polymerase II promoter                 | 141/848  | 3.38E-03     |
| Cellular response to oxidative stress                                                | 30/115   | 3.63E-03     |

Pathway enrichment analysis of differentially regulated genes (DRGs) between pericytes cultured with and without endothelial cells. Analysis was performed using GO Biological Processes on the Enrichr website by uploading DRGs as determined by the Transcriptome Analysis Console (TAC). Second column describes number of regulated genes compared to total number of genes in the pathway, and p-values adjusted for multiple testing are denoted in the last column. The 25 most significant pathways are listed.

**Supplementary Table S3:** Pathway enrichment analysis (KEGG) of differentially regulated genes (DRGs) between pericytes cultured with and without endothelial cells (ECs).

| Pathway                                                  | Overlap | adj. P-value |
|----------------------------------------------------------|---------|--------------|
| Cellular senescence                                      | 39/156  | 1.09E-03     |
| Mitophagy                                                | 22/68   | 1.09E-03     |
| Axon guidance                                            | 41/182  | 3.77E-03     |
| Influenza A                                              | 39/172  | 3.77E-03     |
| Kaposi sarcoma-associated herpesvirus infection          | 42/193  | 4.04E-03     |
| Human cytomegalovirus infection                          | 47/225  | 4.04E-03     |
| Regulation of actin cytoskeleton                         | 45/218  | 6.49E-03     |
| IL-17 signaling pathway                                  | 24/94   | 7.87E-03     |
| Hepatocellular carcinoma                                 | 36/168  | 1.05E-02     |
| Proteoglycans in cancer                                  | 41/205  | 1.73E-02     |
| Biosynthesis of unsaturated fatty acids                  | 10/27   | 1.95E-02     |
| Pathways in cancer                                       | 88/531  | 1.97E-02     |
| Colorectal cancer                                        | 21/86   | 2.22E-02     |
| Oxitocin signaling pathway                               | 32/154  | 2.32E-02     |
| Rheumatoid arthritis                                     | 22/93   | 2.32E-02     |
| Transforming growth factor (TGF) -beta signaling pathway | 22/94   | 2.50E-02     |
| Autophagy                                                | 29/137  | 2.50E-02     |
| Epstein-Barr virus infection                             | 39/202  | 2.58E-02     |
| Measles                                                  | 29/139  | 2.64E-02     |
| Protein processing in endoplasmic reticulum              | 34/171  | 2.64E-02     |
| Vascular smooth muscle contraction                       | 28/133  | 2.64E-02     |
| Prostate cancer                                          | 22/97   | 2.72E-02     |
| Transcriptional misregulation in cancer                  | 37/192  | 2.72E-02     |
| Human T-cell leukemia virus 1 infection                  | 41/219  | 2.72E-02     |
| Legionellosis                                            | 15/57   | 2.72E-02     |

Pathway enrichment analysis of differentially regulated genes (DRGs) between pericytes cultured with and without endothelial cells. Analysis for KEGG pathways was performed on the Enrichr website by uploading DRGs as determined by the Transcriptome Analysis Console (TAC). Second column describes number of regulated genes compared to total number of genes in the pathway, and p-values adjusted for multiple testing are denoted in the last column. The 25 most significant pathways are listed.

**Table S4:** List of pericyte marker gene expression significantly regulated upon co-culture with ECs.

| Gene   | Gene description                           | log2 FC<br>(co- vs. mono-culture) | FDR p-value |
|--------|--------------------------------------------|-----------------------------------|-------------|
| ACTA2  | Actin, alpha 2, smooth muscle, aorta       | 4.0                               | 1.58E-13    |
| IFITM1 | Interferon induced transmembrane protein 1 | 6.2                               | 3.72E-11    |
| RGS5   | Regulator of G-protein signaling 5         | 1.4                               | 0.0005      |
| MYH10  | Myosin, heavy chain 10, non-muscle         | 1.9                               | 0.0007      |
| DES    | Desmin                                     | 2.1                               | 0.004       |

|       |                                  |      |        |
|-------|----------------------------------|------|--------|
| ANPEP | Alanyl (membrane) aminopeptidase | -1.2 | 0.0008 |
|-------|----------------------------------|------|--------|

For differentially regulated genes the log2 fold change (log2 FC) together with the false discovery rate p-value (FDR p-value) is noted in the third and fourth column, respectively. For the analysis a fold change (FC) cut-off of 1.5 ( $\approx \log_2 \text{FC} \pm 0.59$ ) and FDR p-value of 0.05 was applied.

**Table S5:** Selection of upregulated genes in co- vs. mono-cultured pericytes (PCs).

| Gene                          | Gene description                                             | log2 FC<br>(co- vs. mono-culture) | FDR p-<br>value |
|-------------------------------|--------------------------------------------------------------|-----------------------------------|-----------------|
| <b>ECM</b>                    |                                                              |                                   |                 |
| COL11A1                       | Collagen, type XI, alpha 1                                   | 1.9                               | 7.85E-05        |
| COL21A1                       | Collagen, type XXI, alpha 1                                  | 1.6                               | 0.0005          |
| COL8A1                        | Collagen, type VIII, alpha 1                                 | 2.1                               | 0.0008          |
| COL12A1                       | Collagen, type XII, alpha 1                                  | 1.1                               | 0.036           |
| ITGAV                         | Integrin alpha V                                             | 2.1                               | 2.89E-05        |
| ITGA8                         | Integrin alpha 8                                             | 3.3                               | 5.40E-08        |
| EFEMP1                        | EGF containing fibulin-like ECM protein1<br>(fibulin-3)      | 2.5                               | 3.53E-08        |
| CTGF                          | Connective tissue growth factor                              | 1.7                               | 0.036           |
| ADAM9                         | ADAM metallopeptidase domain 9                               | 0.8                               | 0.036           |
| ADAM10                        | ADAM metallopeptidase domain 10                              | 0.8                               | 0.049           |
| ADAMTS5                       | ADAM metallopeptidase with<br>thrombospondin type 1 motif 5  | 1.6                               | 2.29E-06        |
| ADAMTS12                      | ADAM metallopeptidase with<br>thrombospondin type 1 motif 12 | 2.2                               | 0.0044          |
| <b>Inflammatory<br/>genes</b> |                                                              |                                   |                 |
| CXCL1                         | Chemokine (C-X-C motif) ligand 1                             | 2.6                               | 6.71E-06        |
| CXCL8                         | Chemokine (C-X-C motif) ligand 8                             | 5.8                               | 3.89E-12        |
| CXCL5                         | Chemokine (C-X-C motif) ligand 5                             | 1.1                               | 0.0323          |
| CXCL6                         | Chemokine (C-X-C motif) ligand 6                             | 1.6                               | 0.0023          |
| CXCL10                        | Chemokine (C-X-C motif) ligand 10                            | 1.2                               | 0.0148          |
| CCL2                          | Chemokine (C-C motif) ligand 2                               | 3.0                               | 7.26E-09        |
| CCL20                         | Chemokine (C-C motif) ligand 20                              | 4.3                               | 2.71E-09        |
| CX3CL1                        | Chemokine (C-X3-C motif) ligand 1                            | 3.6                               | 2.86E-06        |
| IL6                           | Interleukin 6                                                | 2.3                               | 4.25E-07        |
| SOCS4                         | Suppressor of cytokine signaling 4                           | 1.7                               | 0.0274          |
| SOCS2                         | Suppressor of cytokine signaling 2                           | 0.9                               | 0.0125          |
| ALCAM                         | Activated leukocyte adhesion molecule                        | 2.5                               | 6.68E-06        |
| NCAM2                         | Neural cell adhesion molecule 2                              | 1.8                               | 0.0005          |
| VCAM1                         | Vascular cell adhesion Molecule 1                            | 1.3                               | 0.0101          |
| TLR4                          | Toll-like receptor 4                                         | 1.4                               | 5.69E-05        |
| TLR3                          | Toll-like receptor 3                                         | 1.8                               | 1.44E-06        |

---

|                         |                                                             |     |          |
|-------------------------|-------------------------------------------------------------|-----|----------|
| IFIT1                   | Interferon-induced protein with tetratricopeptide repeats 1 | 8.5 | 1.59E-16 |
| IFI44L                  | Interferon-induced protein 44-like                          | 6.2 | 1.80E-13 |
| IFI27                   | Interferon, alpha-inducible protein 27                      | 4.0 | 1.09E-11 |
| IFIT3                   | Interferon induced protein with tetratricopeptide repeats 3 | 3.0 | 3.72E-11 |
| IFI6                    | Interferon, alpha-inducible protein 6                       | 5.2 | 1.30E-09 |
| IFI44                   | Interferon-induced protein 44                               | 2.5 | 1.50E-07 |
| IFIH1                   | Interferon induced, with helicase C domain 1                | 3.0 | 2.83E-07 |
| IFIT5                   | Interferon-induced protein with tetratricopeptide repeats 5 | 2.0 | 3.51E-06 |
| IFIT2                   | Interferon-induced protein with tetratricopeptide repeats 2 | 2.0 | 1.05E-05 |
| IFI16                   | Interferon, gamma-inducible protein 16                      | 1.5 | 0.0001   |
| IFITM3                  | Interferon induced transmembrane protein 3                  | 1.2 | 0.0018   |
| IFI35                   | Interferon-induced protein 35                               | 0.9 | 0.0353   |
| HLA-A                   | Major histocompatibility complex, class I, A                | 0.9 | 0.0392   |
| HLA-B                   | Major histocompatibility complex, class I, B                | 2.1 | 1.08E-05 |
| HLA-C                   | Major histocompatibility complex, class I, C                | 1.5 | 0.0037   |
| HLA-F                   | Major histocompatibility complex, class I, F                | 1.6 | 0.0002   |
| HLA-G                   | Major histocompatibility complex, class I, G                | 0.6 | 0.0166   |
| HLA-L                   | Major histocompatibility complex, class I, L (pseudogene)   | 1.2 | 0.0031   |
| <b>Secreted factors</b> |                                                             |     |          |
| ANGPT1                  | Angiopoietin 1                                              | 1.3 | 0.0203   |
| ANGPTL                  | Angiopoietin like 1                                         | 1.1 | 0.0275   |
| FGF2                    | Fibroblast growth factor 2 (basic)                          | 1.5 | 0.0005   |
| TGFB2                   | Transforming growth factor beta 2                           | 1.2 | 0.006    |
| TGFB3                   | Transforming growth factor beta 3                           | 2.4 | 1.05E-05 |
| BDNF                    | Brain-derived neurotrophic factor                           | 0.6 | 0.0212   |
| <b>Other proteins</b>   |                                                             |     |          |
| GJA1                    | Gap junction protein alpha 1 (Connexin43)                   | 1.1 | 0.0004   |
| ACTG2                   | Actin, gamma 2, smooth muscle, enteric                      | 4.3 | 5.83E-09 |
| TPM1                    | Tropomyosin 1 (alpha)                                       | 2.2 | 7.67E-08 |
| TAGLN                   | Transgelin (SM22-alpha)                                     | 2.0 | 3.38E-05 |
| MYH11                   | Myosin, heavy chain 11, smooth muscle                       | 1.2 | 0.0079   |
| SOD1                    | Superoxide dismutase 1, soluble                             | 0.7 | 0.0335   |
| SOD2                    | Superoxide dismutase 2, mitochondrial                       | 1.4 | 0.0001   |

---

Selection of upregulated genes in co- vs. mono-cultured pericytes (PCs). Log2 fold changes (log2 FC) and adjusted P-values (FDR p-value) are depicted in the third and fourth column, respectively. Comparison of gene expression data of co-culture vs. mono-culture of PCs in triplicates was performed by using Transcriptome Analysis Console (TAC, Applied Biosystems). For the analysis a fold change (FC) cut-off of 1.5 ( $\approx \log_2 \text{FC} \pm 0.59$ ) and FDR p-value of 0.05 was applied.

**Table S6:** Selection of downregulated genes in co- vs. mono-cultured pericytes (PCs).

| Gene                      | Gene description                                              | log2 FC<br>(co- vs. mono-culture) | FDR p-value |
|---------------------------|---------------------------------------------------------------|-----------------------------------|-------------|
| <b>ECM</b>                |                                                               |                                   |             |
| COL14A1                   | Collagen, type XIV, alpha 1                                   | -2.0                              | 1.05E-05    |
| COL6A1                    | Collagen, type VI, alpha 1                                    | -1.3                              | 0.040       |
| COL6A2                    | Collagen, type VI, alpha 2                                    | -1.2                              | 0.0093      |
| COL6A3                    | Collagen, type VI, alpha 3                                    | -1.4                              | 0.0086      |
| ITGA10                    | Integrin alpha 10                                             | -1.3                              | 0.0009      |
| ITGB4                     | Integrin beta 4                                               | -1.1                              | 0.011       |
| NID1                      | Nidogen1                                                      | -1.9                              | 1.94E-05    |
| LAMA5                     | Laminin, alpha 5                                              | -1.3                              | 3.42E-05    |
| LAMC1                     | Laminin, gamma 1                                              | -0.8                              | 0.037       |
| MMP1                      | Matrix metalloproteinase 1                                    | -2.5                              | 1.23E-06    |
| MMP2                      | Matrix metalloproteinase 2                                    | -1.6                              | 0.0064      |
| MMP19                     | Matrix metalloproteinase 19                                   | -0.85                             | 0.023       |
| ADAMTS15                  | ADAM metalloproteinase with<br>thrombospondin type 1 motif 15 | -2.5                              | 1.56E-06    |
| ADAMTS9                   | ADAM metalloproteinase with<br>thrombospondin type 1 motif 9  | -1.3                              | 0.0008      |
| TIMP1                     | TIMP metalloproteinase inhibitor 1                            | -0.9                              | 0.0246      |
| TIMP2                     | TIMP metalloproteinase inhibitor 2                            | -0.8                              | 0.0125      |
| TIMP3                     | TIMP metalloproteinase inhibitor 3                            | -0.7                              | 0.0023      |
| TGFB1                     | Transforming growth factor, beta-induced,<br>68 kDa           | -1.2                              | 0.0051      |
| LTBP1                     | Latent transforming growth factor beta<br>binding protein 1   | -1                                | 0.0037      |
| LTBP3                     | Latent transforming growth factor beta<br>binding protein 3   | -1.6                              | 0.0003      |
| LTBP4                     | Latent transforming growth factor beta<br>binding protein 4   | -0.95                             | 0.0209      |
| <b>Inflammatory genes</b> |                                                               |                                   |             |
| CXCL12                    | Chemokine (C-X-C motif) ligand 12                             | -1.0                              | 0.0004      |

| <b>Secreted factors</b> |                                                       |      |          |
|-------------------------|-------------------------------------------------------|------|----------|
| ANGPTL4                 | Angiopoietin like 4                                   | -1.1 | 0.0416   |
| VEGFA                   | Vascular endothelial growth factor A                  | -1.6 | 8.77E-05 |
| WNT9B                   | Wingless-type MMTV integration site family, member 9B | -1.3 | 0.0002   |
| WNT5A                   | Wingless-type MMTV integration site family, member 5A | -1.2 | 0.0012   |
| LGALS3                  | Lectin, galactoside-binding, soluble 3                | -1.8 | 0.0055   |
| <b>Other proteins</b>   |                                                       |      |          |
| PTGER2                  | Prostaglandin E receptor 2 (EP2)                      | -3.5 | 2.50E-07 |
| PTGER4                  | Prostaglandin E receptor 4 (EP4)                      | -1.1 | 0.0223   |
| EGFR                    | Epidermal growth factor receptor                      | -0.7 | 0.0405   |
| LRP1                    | LDL receptor related protein 1                        | -2.5 | 2.85E-06 |
| LRP10                   | LDL receptor related protein 10                       | -1.3 | 0.0246   |
| EREG                    | Epiregulin                                            | -1.0 | 0.0213   |
| NRG1                    | Neuregulin 1                                          | -1.9 | 0.0002   |
| CAPN2                   | Calpain (m/II) large subunit                          | -1.3 | 0.0201   |
| EFNA5                   | Ephrin A5                                             | -2.2 | 1.13E-06 |
| SMAD1                   | SMAD family member 1                                  | -1.1 | 0.0033   |
| SMAD3                   | SMAD family member 3                                  | -2.3 | 4.49E-07 |
| SMAD7                   | SMAD family member 7                                  | -1.2 | 0.0323   |

Selection of downregulated genes in co- vs. mono-cultured pericytes (PCs). Log2 fold changes (log2 FC) and adjusted P-values (FDR p-value) are depicted in the third and fourth column, respectively. Comparison of gene expression data of co-culture vs. mono-culture of PCs in triplicates was performed by using Transcriptome Analysis Console (TAC, Applied Biosystems). For the analysis a fold change (FC) cut-off of 1.5 ( $\approx \log_2 \text{FC} \pm 0.59$ ) and FDR p-value of 0.05 was applied.

**Table S7:** List of upregulated transporters, carriers, ion pumps and G protein-coupled receptors in pericytes co-cultured with endothelial cells vs. pericytes cultured alone.

| <b>Gene</b> | <b>Gene description</b>                                                                                 | <b>log2 FC<br/>(co- vs. mono-culture)</b> | <b>FDR p-value</b> |
|-------------|---------------------------------------------------------------------------------------------------------|-------------------------------------------|--------------------|
| SLC1A1      | Solute carrier family 1 (neuronal/epithelial high affinity glutamate transporter, system Xag), member 1 | 1.5                                       | 3.88E-05           |
| SLC4A4      | Solute carrier family 4 (sodium bicarbonate cotransporter), member 4                                    | 1.8                                       | 0.0006             |
| SLC7A2      | Solute carrier family 7 (cationic amino acid transporter, y+ system), member 2                          | 0.9                                       | 0.0085             |
| SLC16A1     | Solute carrier family 16 (monocarboxylate transporter), member 1/MCT1                                   | 1.1                                       | 0.0011             |

---

|          |                                                                                        |     |        |
|----------|----------------------------------------------------------------------------------------|-----|--------|
| SLC16A7  | Solute carrier family 16 (monocarboxylate transporter), member 7                       | 2.1 | 0.0011 |
| SLC17A5  | Solute carrier family 17 (acidic sugar transporter), member 5                          | 0.8 | 0.0256 |
| SLC25A13 | Solute carrier family 25 (aspartate/glutamate carrier), member 13                      | 0.9 | 0.013  |
| SLC25A32 | Solute carrier family 25 (mitochondrial folate carrier), member 32                     | 1.2 | 0.0003 |
| SLC25A46 | Solute carrier family 25, member 46                                                    | 1.6 | 0.0011 |
| SLC26A2  | Solute carrier family 26 (anion exchanger), member 2                                   | 1.2 | 0.0034 |
| SLC35A3  | Solute carrier family 35 (UDP-N-acetylglucosamine (UDP-GlcNAc) transporter), member A3 | 1.8 | 0.0001 |
| SLC35B3  | Solute carrier family 35 (adenosine 3-phospho 5-phosphosulfate transporter), member B3 | 0.7 | 0.0329 |
| SLC35F5  | Solute carrier family 35, member F5                                                    | 1.0 | 0.0128 |
| SLC37A1  | Solute carrier family 37 (glucose-6-phosphate transporter), member 1                   | 0.6 | 0.0245 |
| SLC38A1  | Solute carrier family 38, member 1                                                     | 2.1 | 0.0027 |
| SLC39A9  | Solute carrier family 39, member 9                                                     | 0.9 | 0.0053 |
| ABCA11P  | ATP binding cassette subfamily A member 11, pseudogene                                 | 2.3 | 0.0085 |
| ABCE1    | ATP binding cassette subfamily E member 1                                              | 1.0 | 0.026  |
| TAP1     | Transporter 1, ATP-binding cassette, subfamily B (MDR/TAP)                             | 1.2 | 0.0024 |
| ATP2B1   | ATPase, Ca <sup>++</sup> transporting, plasma membrane 1                               | 1.2 | 0.0084 |
| ATP5E    | ATP synthase, H <sup>+</sup> transporting, mitochondrial F1 complex, epsilon subunit   | 0.8 | 0.0011 |
| ATP6AP1L | ATPase, H <sup>+</sup> transporting, lysosomal accessory protein 1-like                | 0.7 | 0.011  |
| ATP6V1B2 | ATPase, H <sup>+</sup> transporting, lysosomal 56/58kDa, V1 subunit B2                 | 1.0 | 0.0011 |
| ATP6V1E1 | ATPase, H <sup>+</sup> transporting, lysosomal 31kDa, V1 subunit E1                    | 0.9 | 0.009  |
| ATP8B1   | ATPase, aminophospholipid transporter, class I, type 8B, member 1                      | 1.7 | 0.0067 |
| ATP10A   | ATPase, class V, type 10A                                                              | 1.8 | 0.0066 |
| ATP11C   | ATPase, class VI, type 11C                                                             | 1.9 | 0.0003 |
| ATP13A3  | ATPase type 13A3                                                                       | 1.4 | 0.0003 |

---



|         |                                                                       |     |          |
|---------|-----------------------------------------------------------------------|-----|----------|
| CLIC4   | Chloride intracellular channel 4                                      | 1.2 | 0.0074   |
| NALCN   | Sodium leak channel, non-selective                                    | 1.3 | 0.0009   |
| SCN3A   | Sodium channel, voltage gated, type III<br>alpha subunit              | 1.1 | 0.0401   |
| TRPC4   | Transient receptor potential cation channel,<br>subfamily C, member 4 | 2.3 | 9.20E-07 |
| TRPC6   | Transient receptor potential cation channel,<br>subfamily C, member 6 | 0.7 | 0.0132   |
| TRPM7   | Transient receptor potential cation channel,<br>subfamily M, member 7 | 1.2 | 0.0362   |
| KCNJ6   | Potassium channel, inwardly rectifying<br>subfamily J, member 6       | 0.7 | 0.0261   |
| KCNMB1  | Potassium channel subfamily M regulatory<br>beta subunit 1            | 1.5 | 0.0027   |
| KCNT1   | Potassium channel, sodium activated<br>subfamily T, member 2          | 3.3 | 1.81E-09 |
| TMC8    | Transmembrane channel like 8                                          | 0.6 | 0.0439   |
| ADORA2B | Adenosine A2b receptor                                                | 0.8 | 0.0336   |
| CALCRL  | Calcitonin receptor like receptor                                     | 1.4 | 0.0417   |
| FZD6    | Frizzled class receptor 6                                             | 1.4 | 2.48E-05 |
| GPRC5A  | G protein-coupled receptor, class C, group<br>5, member A             | 1.1 | 0.0042   |
| GPR155  | G protein-coupled receptor 155                                        | 1.3 | 0.0173   |
| GPR180  | G protein-coupled receptor 180                                        | 1.6 | 0.0002   |
| LGR5    | Leucine-rich repeat containing G protein-<br>coupled receptor 5       | 1.0 | 0.0177   |
| OPN3    | Opsin 3                                                               | 1.3 | 0.0068   |
| PTGFR   | Prostaglandin F receptor (FP)                                         | 2.8 | 9.21E-07 |

Comparison of gene expression data of co-culture vs. mono-culture of PCs in triplicates was performed by using Transcriptome Analysis Console (TAC, Applied Biosystems). For the analysis a fold change (FC) cut-off of 1.5 ( $\approx \log_2 \text{FC} \pm 0.59$ ) and FDR p-value of 0.05 was applied. Log2 fold changes ( $\log_2 \text{FC}$ ) and adjusted P-values (FDR p-value) are depicted in the third and fourth column, respectively.

**Table S8:** List of downregulated transporters, carriers, ion pumps and G protein-coupled receptors in pericytes co-cultured with endothelial cells vs. pericytes cultured alone.

| Gene   | Gene description                                                          | $\log_2 \text{FC}$<br>(co- vs. mono-culture) | FDR p-<br>value |
|--------|---------------------------------------------------------------------------|----------------------------------------------|-----------------|
| SLC2A1 | Solute carrier family 2 (facilitated glucose transporter), member 1/GLUT1 | -0.7                                         | 0.0238          |
| SLC6A6 | Solute carrier family 6 (neurotransmitter transporter), member 6          | -3.5                                         | 1.28E-08        |

---

|          |                                                                                               |      |          |
|----------|-----------------------------------------------------------------------------------------------|------|----------|
| SLC6A9   | Solute carrier family 6 (neurotransmitter transporter, glycine), member 9/GLYT1               | -1.2 | 0.0028   |
| SLC9A3   | Solute carrier family 9, subfamily A (NHE3, cation proton antiporter 3), member 3             | -0.8 | 0.0181   |
| SLC9A3R2 | Solute carrier family 9, subfamily A (NHE3, cation proton antiporter 3), member 3 regulator 2 | -1.1 | 0.0015   |
| SLC9A9   | Solute carrier family 9, subfamily A (NHE9, cation proton antiporter 9), member 9             | -1.9 | 2.19E-06 |
| SLC14A1  | Solute carrier family 14 (urea transporter), member 1 (Kidd blood group)                      | -3.3 | 8.03E-08 |
| SLC16A6  | Solute carrier family 16, member 6                                                            | -1.5 | 0.0024   |
| SLC20A1  | Solute carrier family 20 (phosphate transporter), member 1                                    | -2.3 | 5.72E-07 |
| SLC25A6  | Solute carrier family 25 (mitochondrial carrier; adenine nucleotide translocator), member 6   | -2.0 | 2.85E-06 |
| SLC25A38 | Solute carrier family 25, member 38                                                           | -1.4 | 0.0094   |
| SLC35E2B | Solute carrier family 35, member E2B                                                          | -1.7 | 6.96E-05 |
| SLC35E2  | Solute carrier family 35, member E2                                                           | -1.3 | 7.37E-05 |
| SLC38A9  | Solute carrier family 38, member 9                                                            | -1.3 | 0.0219   |
| SLC44A1  | Solute carrier family 44 (choline transporter), member 1                                      | -0.9 | 0.0101   |
| SLC44A4  | Solute carrier family 44, member 4                                                            | -0.9 | 0.0024   |
| SLCO5A1  | Solute carrier organic anion transporter family, member 5A1                                   | -0.8 | 0.0154   |
| ABCF3    | ATP binding cassette subfamily F member 3                                                     | -0.8 | 0.0482   |
| ATP5D    | ATP synthase, H <sup>+</sup> transporting, mitochondrial F1 complex, delta subunit            | -1.5 | 0.0005   |
| ATP6V0A1 | ATPase, H <sup>+</sup> transporting, lysosomal V0 subunit a1                                  | -1.0 | 0.0048   |
| ATP6V0D1 | ATPase, H <sup>+</sup> transporting, lysosomal 38kDa, V0 subunit d1                           | -0.7 | 0.0447   |
| ATP8B2   | ATPase, aminophospholipid transporter, class I, type 8B, member 2                             | -0.7 | 0.0082   |
| ATP9A    | ATPase, class II, type 9A                                                                     | -0.8 | 0.0047   |
| ATP13A1  | ATPase type 13A1                                                                              | -0.8 | 0.0081   |
| TPCN1    | Two pore calcium channel protein 1                                                            | -0.8 | 0.0014   |
| KCNMA1   | Potassium channel, calcium activated large conductance subfamily M alpha, member 1            | -1.8 | 0.0004   |
| PIEZO2   | Piezo-type mechanosensitive ion channel component 2                                           | -1.8 | 8.31E-05 |

---

|         |                                       |      |          |
|---------|---------------------------------------|------|----------|
| CMKLR1  | Chemerin chemokine-like receptor 1    | -1.1 | 0.0008   |
| GPER    | G protein-coupled estrogen receptor 1 | -1.2 | 5.74E-05 |
| GPR137B | G protein-coupled receptor 137B       | -1.4 | 0.0017   |
| S1PR3   | Sphingosine-1-phosphate receptor 3    | -0.9 | 0.0464   |

Comparison of gene expression data of co-culture vs. mono-culture of PCs in triplicates was performed by using Transcriptome Analysis Console (TAC, Applied Biosystems). For the analysis a fold change (FC) cut-off of 1.5 ( $\approx \log_2 FC \pm 0.59$ ) and FDR p-value of 0.05 was applied. Log2 fold changes ( $\log_2 FC$ ) and adjusted P-values (FDR p-value) are depicted in the third and fourth column, respectively.

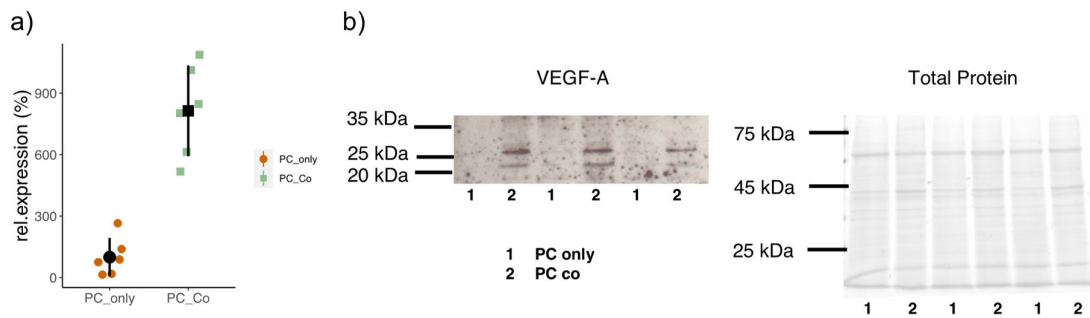

**Figure S2:** VEGF-A expression in mono- and co-culture pericytes (PCs).

PCs were cultured on Transwell inserts alone (PC only) or in co-culture with endothelial cells on the abluminal surface (PC co) for 7 days before they were trypsinized and lysed for Western blotting. VEGF-A expression levels are shown after normalization to total protein stain (a). Immunoblots for VEGF-A (Santa Cruz, #sc-152, predicted molecular weight: 21-25 kDa) and for total protein stain (REVERT, total protein stain, LI-COR, #926-11011) are shown (b). Experiment has been performed two times in triplicates and data represent mean  $\pm$  sd.

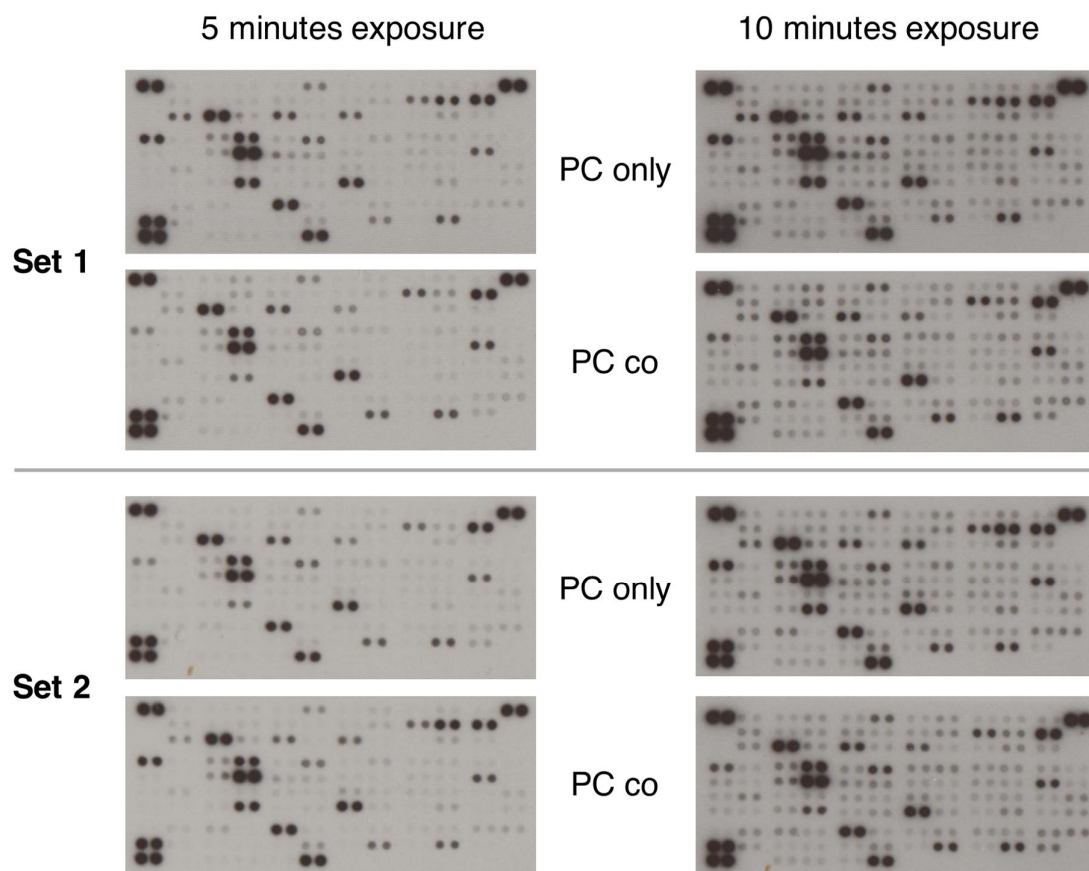

**Figure S3:** Array blots from Proteome Profiler Human XL Cytokine Array Kit. Analysis was performed on cell lysates obtained from pericytes cultured alone (PC only) and in co-culture with endothelial cells (PC co). Experiments were performed two times with independent samples at two different exposure times of 5- and 10 min, in order to optimally determine expression levels of proteins with a high and low expression profile.

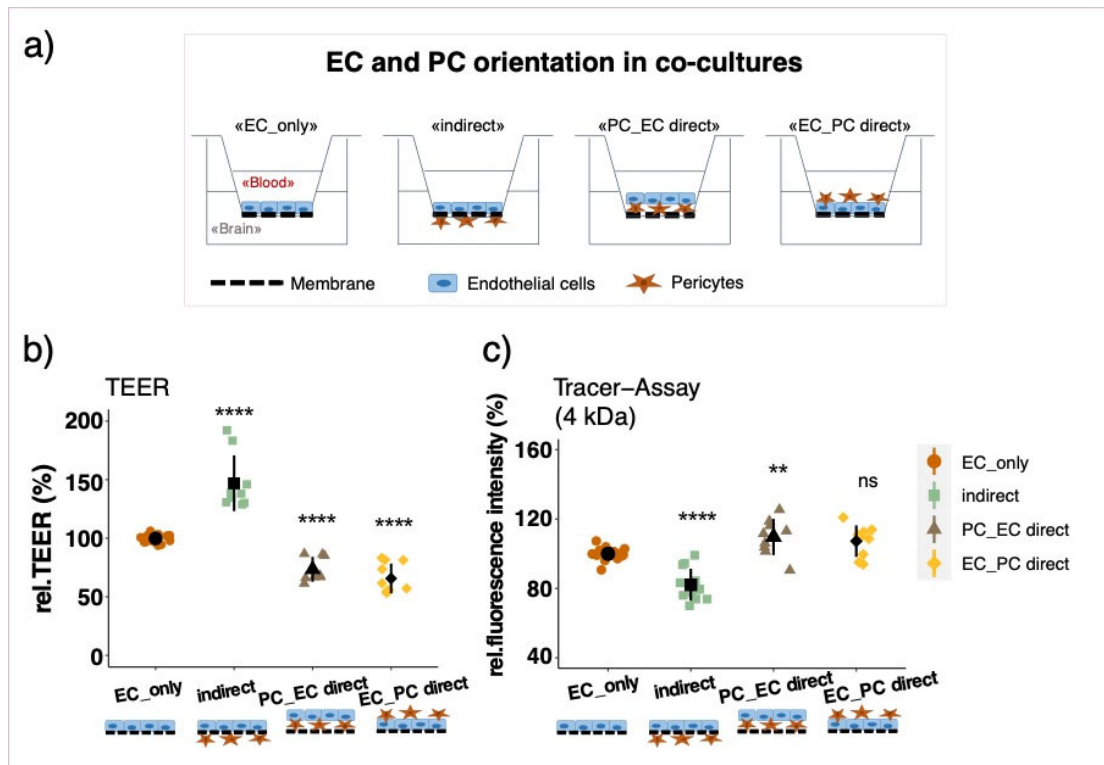

**Figure S4:** Measurements of endothelial barrier function with and without pericytes (PCs) in different constellations (recently published in *Cells* [18]). Endothelial cells (ECs) were cultured on Transwell inserts alone (EC\_only), with PCs on the opposite side of the insert (indirect) or on the same side (PC\_EC direct: PCs seeded first; and EC\_PC direct: ECs seeded first) (a). Cells were cultured for 7 days before barrier function was assessed. Relative trans-endothelial electric resistance (TEER) measurements with a CellZcope instrument (b). Relative fluorescence intensity measured by macromolecular tracer assay with FITC-dextran 4 kDa (c). Experiments were performed at least three times in triplicates and data represent mean  $\pm$  sd. \*\*  $P < 0.01$ , \*\*\*\*  $P < 0.0001$ , compared to “EC\_only”. Kruskal-Wallis rank sum test and subsequent pairwise Wilcoxon test with Benjamini–Hochberg corrections for multiple comparisons.

**Supplementary Table S9:** Differentially regulated genes (DRGs) that are common in endothelial cells (ECs) and pericytes (PCs) upon co-culture.

| Gene   | Gene description                                           | Regulation in PCs | Regulation in ECs |
|--------|------------------------------------------------------------|-------------------|-------------------|
| AK5    | Adenylate kinase 5                                         | up                | up                |
| EFEMP1 | EGF containing fibulin-like extracellular matrix protein 1 | up                | up                |
| CFH    | Complement factor H                                        | up                | up                |
| TGFB2  | Transforming growth factor beta 2                          | up                | up                |
| KCNT2  | potassium channel, sodium activated subfamily T, member 2  | up                | up                |
| EDIL3  | EGF-like repeats and discoidin I-like domains 3            | up                | up                |
| NEGR1  | Neuronal growth regulator 1                                | up                | up                |
| TAGLN  | Transgelin                                                 | up                | up                |

---

|        |                                                                                                      |      |      |
|--------|------------------------------------------------------------------------------------------------------|------|------|
| ANKRD1 | Ankyrin repeat domain 1 (cardiac muscle)                                                             | up   | up   |
| MGP    | Matrix Gla protein                                                                                   | up   | up   |
| TCF4   | Transcription factor 4                                                                               | up   | up   |
| FOSL1  | FOS-like antigen 1                                                                                   | down | down |
| MGST1  | Microsomal glutathione S-transferase 1                                                               | down | down |
| EMP1   | Epithelial membrane protein 1                                                                        | down | down |
| RAC2   | Ras-related C3 botulinum toxin substrate 2 (rho family, small GTP binding protein Rac2)              | down | down |
| CYP1B1 | Cytochrome P450, family 1, subfamily B, polypeptide 1                                                | down | down |
| ANTXR2 | Anthrax toxin receptor 2                                                                             | down | down |
| LTBP1  | Latent transforming growth factor beta binding protein 1                                             | down | down |
| STC2   | Stanniocalcin 2                                                                                      | down | down |
| NFE2L3 | Nuclear factor, erythroid 2-like 3                                                                   | down | down |
| G0S2   | G0/G1 switch 2                                                                                       | down | down |
| ISG15  | ISG15 ubiquitin-like modifier                                                                        | up   | down |
| IFI44  | Interferon-induced protein 44-like                                                                   | up   | down |
| FABP3  | Fatty acid binding protein 3, muscle and heart                                                       | up   | down |
| SCP2   | Sterol carrier protein 2                                                                             | up   | down |
| MTHFD2 | Methylenetetrahydrofolate dehydrogenase (NADP+ dependent) 2, methenyltetrahydrofolate cyclohydrolase | up   | down |
| CMPK2  | Cytidine monophosphate (UMP-CMP) kinase 2, mitochondrial                                             | up   | down |
| SCG2   | Secretogranin II                                                                                     | up   | down |
| DOCK10 | Dedicator of cytokinesis 10                                                                          | up   | down |
| RSAD2  | Radical S-adenosyl methionine domain containing 2                                                    | up   | down |
| PTX3   | Pentraxin 3, long                                                                                    | up   | down |
| MINA   | MYC induced nuclear antigen                                                                          | up   | down |
| NCEH1  | Neutral cholesterol ester hydrolase 1                                                                | up   | down |
| CLDN1  | Claudin 1                                                                                            | up   | down |
| CXCL8  | Chemokine (C-X-C motif) ligand 8                                                                     | up   | down |
| CXCL5  | Chemokine (C-X-C motif) ligand 5                                                                     | up   | down |
| CXCL10 | Chemokine (C-X-C motif) ligand 10                                                                    | up   | down |
| CXCL6  | Chemokine (C-X-C motif) ligand 6                                                                     | up   | down |
| GPX8   | Glutathione peroxidase 8 (putative)                                                                  | up   | down |
| POLR3G | Polymerase (RNA) III (DNA directed) polypeptide G (32kD)                                             | up   | down |
| BAG2   | BCL2-associated athanogene 2                                                                         | up   | down |
| TUBE1  | Tubulin, epsilon 1                                                                                   | up   | down |
| EEF1E1 | Eukaryotic translation elongation factor 1 epsilon 1                                                 | up   | down |
| HDAC9  | Histone deacetylase 9                                                                                | up   | down |
| INSIG1 | Insulin induced gene 1                                                                               | up   | down |
| PARP12 | Poly(ADP-ribose) polymerase family member 12                                                         | up   | down |
| DDX58  | DEAD (Asp-Glu-Ala-Asp) box polypeptide 58                                                            | up   | down |
| PLAU   | Plasminogen activator, urokinase                                                                     | up   | down |

---

|         |                                                             |      |      |
|---------|-------------------------------------------------------------|------|------|
| IFIT2   | Interferon-induced protein with tetratricopeptide repeats 2 | up   | down |
| IFIT3   | Interferon-induced protein with tetratricopeptide repeats 3 | up   | down |
| IFIT1   | Interferon-induced protein with tetratricopeptide repeats 1 | up   | down |
| IDI1    | Isopentenyl-diphosphate delta isomerase 1                   | up   | down |
| GLIPR1  | GLI pathogenesis-related 1                                  | up   | down |
| SOCS2   | Suppressor of cytokine signaling 2                          | up   | down |
| RRAS2   | Related RAS viral (r-ras) oncogene homolog 2                | up   | down |
| OAS1    | 2-5-oligoadenylate synthetase 1                             | up   | down |
| IFI27   | Interferon, alpha-inducible protein 27                      | up   | down |
| TRIM69  | Tripartite motif containing 69                              | up   | down |
| ADORA2B | Adenosine A2b receptor                                      | up   | down |
| USP18   | Ubiquitin specific peptidase 18                             | up   | down |
| BID     | BH3 interacting domain death agonist                        | up   | down |
| USP41   | Ubiquitin specific peptidase 41                             | up   | down |
| ABLIM1  | Actin binding LIM protein 1                                 | down | up   |
| METTL7A | Methyltransferase like 7A                                   | down | up   |
| EFNA5   | Ephrin-A5                                                   | down | up   |
| LPCAT2  | Lysophosphatidylcholine acyltransferase 2                   | down | up   |

In total, 66 DRGs were common in the two cell types, as is visible from the Venn Diagram in Figure 6. The regulation of genes in co-cultured vs. mono-cultured cells is denoted in the third and fourth columns, respectively. Comparison of gene expression data of co-cultured vs. mono-cultured PCs and ECs, respectively, in triplicates was performed by using Transcriptome Analysis Console (TAC, Applied Biosystems). For the analysis a fold change (FC) cut-off of 1.5 ( $\approx \log_2 FC \pm 0.59$ ) and FDR p-value of 0.05 was applied.

**Supplementary Table S10:** Pathway enrichment analysis (BioPlanet) of differentially regulated genes (DRGs) that are common in ECs and PCs.

| Pathway                                                                              | Overlap | adj. P-value |
|--------------------------------------------------------------------------------------|---------|--------------|
| Interferon alpha/beta signaling                                                      | 7/64    | 7.21E-11     |
| Interferon signaling                                                                 | 8/168   | 2.37E-09     |
| Immune system signaling by interferons, interleukins, prolactin, and growth hormones | 8/280   | 1.27E-07     |
| Interleukin-1 regulation of extracellular matrix                                     | 6/120   | 2.09E-07     |
| FRA pathway                                                                          | 4/37    | 1.16E-06     |
| TGF-beta regulation of extracellular matrix                                          | 9/565   | 2.57E-06     |
| Type II interferon signaling (interferon-gamma)                                      | 4/50    | 3.97E-06     |
| Binding of chemokines to chemokine receptors                                         | 4/54    | 5.42E-06     |
| Antiviral mechanism by interferon-stimulated genes                                   | 4/70    | 1.53E-05     |
| RIG-I-like receptor signaling pathway                                                | 4/71    | 1.62E-05     |

Analysis was performed using NCATS BioPlanet on the Enrichr website with DRGs. Second column describes number of commonly regulated genes compared to total number of genes in the pathway. P-values adjusted for multiple testing (adj. P-value) are noted in the last column.

---

**Supplementary Table S11:** Differential regulation of interferon-induced genes in co-cultured PCs and ECs.

| Gene  | Gene description                                            | Regulation<br>in PCs | Regulation<br>in ECs |
|-------|-------------------------------------------------------------|----------------------|----------------------|
| IFIT1 | Interferon-induced protein with tetratricopeptide repeats 1 | +8.5                 | -1.7                 |
| IFI44 | Interferon-induced protein 44-like                          | +2.5                 | -1.1                 |
| IFI27 | Interferon, alpha-inducible protein 27                      | +4.0                 | -1.1                 |
| IFIT2 | Interferon-induced protein with tetratricopeptide repeats 2 | +2.0                 | -1.9                 |
| IFIT3 | Interferon-induced protein with tetratricopeptide repeats 3 | +3.5                 | -1.7                 |

Interferon-induced genes that are regulated in both, PCs and ECs upon co-culture. Comparison of gene expression data of co-cultured vs. mono-cultured PCs and ECs, respectively, in triplicates was performed by using Transcriptome Analysis Console (TAC, Applied Biosystems). For the analysis a fold change (FC) cut-off of 1.5 ( $\approx \log_2 \text{FC} \pm 0.59$ ) and FDR p-value of 0.05 was applied.
